# Supplementary material for: Genome-wide association and replication study of anti-tuberculosis drugs-induced liver toxicity
Source: PubMed Central journal article supplement (PMC5037629; doi:10.1186/s12864-016-3078-3), 2016-09-26
Supplement: 12864_2016_3078_MOESM1_ESM.pdf [file 12864_2016_3078_MOESM1_ESM.pdf]

**Table S1.** Top fifteen SNPs in the GWAS of ATDILI.

| SNP        | Chr (loci)    | Alleles (RA) | 11vs                 | 22vs                 | 1vs2                 | $P_{min}$            | $P_{adj}$            | OR (95% CI)    | MAF  | Nearest gene    |
|------------|---------------|--------------|----------------------|----------------------|----------------------|----------------------|----------------------|----------------|------|-----------------|
| rs10946739 | 6 (24993127)  | A/G (A)      | $1.1 \times 10^{-3}$ | $2.5 \times 10^{-4}$ | $9.6 \times 10^{-6}$ | $9.6 \times 10^{-6}$ | $4.1 \times 10^{-6}$ | 3.4 (2.0-5.6)  | 0.19 | <i>FAM65B</i>   |
| rs7708937  | 5 (123169574) | T/C (T)      | $4.0 \times 10^{-2}$ | $1.1 \times 10^{-5}$ | $4.8 \times 10^{-6}$ | $4.8 \times 10^{-6}$ | $4.4 \times 10^{-6}$ | 4.0 (2.4-6.7)  | 0.11 | <i>KRT18P16</i> |
| rs10946737 | 6 (24967240)  | A/G (A)      | $1.2 \times 10^{-1}$ | $2.4 \times 10^{-5}$ | $2.0 \times 10^{-5}$ | $2.0 \times 10^{-5}$ | $9.7 \times 10^{-6}$ | 4.3 (2.5-7.4)  | 0.10 | <i>FAM65B</i>   |
| rs2089910  | 11 (1874404)  | T/C (T)      | $1.2 \times 10^{-2}$ | $2.2 \times 10^{-5}$ | $5.3 \times 10^{-6}$ | $2.2 \times 10^{-6}$ | $4.2 \times 10^{-5}$ | 2.7 (1.8-4.2)  | 0.30 | <i>LSP1</i>     |
| rs4903067  | 14 (73286300) | T/C (C)      | $9.9 \times 10^{-6}$ | $2.9 \times 10^{-1}$ | $6.1 \times 10^{-5}$ | $9.9 \times 10^{-6}$ | $8.1 \times 10^{-5}$ | 3.0 (1.7-5.1)  | 0.17 | <i>DPF3</i>     |
| rs320035   | 1 (49089197)  | A/G (G)      | $2.5 \times 10^{-3}$ | $4.9 \times 10^{-5}$ | $3.5 \times 10^{-6}$ | $3.5 \times 10^{-6}$ | $1.3 \times 10^{-4}$ | 2.4 (1.5-3.8)  | 0.48 | <i>AGBL4</i>    |
| rs393994   | 1 (49108745)  | T/C (C)      | $2.5 \times 10^{-3}$ | $9.6 \times 10^{-5}$ | $6.1 \times 10^{-6}$ | $6.1 \times 10^{-6}$ | $1.7 \times 10^{-4}$ | 2.4 (1.5-3.7)  | 0.48 | <i>AGBL4</i>    |
| rs2069912  | 2 (128178191) | T/C (T)      | $2.9 \times 10^{-5}$ | $9.3 \times 10^{-2}$ | $1.2 \times 10^{-5}$ | $1.2 \times 10^{-5}$ | $1.7 \times 10^{-4}$ | 5.3 (2.2-12.5) | 0.22 | <i>PROC</i>     |
| rs320003   | 1 (49126778)  | A/G (A)      | $2.1 \times 10^{-4}$ | $2.6 \times 10^{-3}$ | $1.7 \times 10^{-5}$ | $1.7 \times 10^{-5}$ | $2.3 \times 10^{-4}$ | 2.3 (1.5-3.7)  | 0.48 | <i>AGBL4</i>    |
| rs319952   | 1 (49113622)  | A/G (G)      | $2.5 \times 10^{-3}$ | $2.1 \times 10^{-4}$ | $1.1 \times 10^{-5}$ | $1.1 \times 10^{-5}$ | $2.8 \times 10^{-4}$ | 2.3 (1.5-3.6)  | 0.48 | <i>AGBL4</i>    |
| rs239319   | 22 (34120608) | A/G (G)      | $1.1 \times 10^{-1}$ | $3.7 \times 10^{-5}$ | $1.3 \times 10^{-4}$ | $3.7 \times 10^{-6}$ | $2.8 \times 10^{-4}$ | 2.3 (1.5-3.6)  | 0.39 | <i>LARGE</i>    |
| rs3959930  | 11 (15835975) | T/C (T)      | $7.8 \times 10^{-1}$ | $7.2 \times 10^{-7}$ | $5.4 \times 10^{-4}$ | $7.2 \times 10^{-7}$ | $1.1 \times 10^{-3}$ | 2.1 (1.4-3.3)  | 0.27 | <i>SOX6</i>     |
| rs3892834  | 12 (16486288) | A/G (A)      | $2.0 \times 10^{-5}$ | $4.0 \times 10^{-1}$ | $6.5 \times 10^{-5}$ | $2.0 \times 10^{-5}$ | $1.1 \times 10^{-3}$ | 3.1 (1.6-6.3)  | 0.26 | <i>MGST1</i>    |
| rs4733759  | 8 (128804840) | T/C (T)      | $1.0 \times 10^{-5}$ | $1.6 \times 10^{-1}$ | $6.1 \times 10^{-4}$ | $1.0 \times 10^{-5}$ | $1.6 \times 10^{-3}$ | 2.1 (1.3-3.2)  | 0.36 | <i>PVT1</i>     |
| rs2835109  | 21 (37107446) | A/G (A)      | $2.0 \times 10^{-5}$ | $3.7 \times 10^{-1}$ | $9.8 \times 10^{-6}$ | $9.8 \times 10^{-6}$ | $6.1 \times 10^{-3}$ | 16.1 (2.2-116) | 0.14 | <i>RPS20P1</i>  |

11vs - Dominant or recessive-inheritance model of Fisher's exact test depending on inheritance mode of allele 1; 22vs - Dominant or recessive-inheritance model of Fisher's exact test depending on inheritance mode of allele 2; 1vs2 - Allelic model of Fisher's exact test; ATDILI - Anti-tuberculosis drugs induced liver injury; Chr (loci) - Chromosome, and chromosomal loci based on NCBI built 37; CI - Confidence interval; GWAS - Genome wide association study; MAF - Minor allele frequency; OR - Odds ratio;  $P_{adj}$  - Logistic  $P$ -value after adjustment for sex, HIV status, CD4 count and HIV viral load;  $P_{min}$  - Minimum  $P$ -value among the genetic models of Fisher's exact test; RA - Risk allele; SNP - Single nucleotide polymorphism

**Table S2.** Top fifteen SNPs in the replication study of ATDILI.

| SNP        | Chr (loci)    | Alleles | 11vs                 | 22vs                 | 1vs2                 | $P_{\min}$           | $P_{\text{adj}}$     | OR (95% CI)   | MAF  | Nearest gene        |
|------------|---------------|---------|----------------------|----------------------|----------------------|----------------------|----------------------|---------------|------|---------------------|
| rs319952   | 1 (49113622)  | A/G     | $1.5 \times 10^{-1}$ | $1.3 \times 10^{-2}$ | $1.2 \times 10^{-2}$ | $1.2 \times 10^{-2}$ | $1.0 \times 10^{-2}$ | 2.3 (1.2-4.4) | 0.50 | <i>AGBLA</i>        |
| rs320003   | 1 (49126778)  | A/G     | $2.0 \times 10^{-2}$ | $3.0 \times 10^{-1}$ | $1.9 \times 10^{-2}$ | $1.9 \times 10^{-2}$ | $1.2 \times 10^{-2}$ | 2.3 (1.2-4.5) | 0.50 | <i>AGBLA</i>        |
| rs320035   | 1 (49089197)  | A/G     | $2.4 \times 10^{-1}$ | $4.2 \times 10^{-3}$ | $5.8 \times 10^{-3}$ | $4.2 \times 10^{-3}$ | $1.2 \times 10^{-2}$ | 2.2 (1.9-3.9) | 0.50 | <i>AGBLA</i>        |
| rs1432988  | 5 (164771289) | A/G     | $3.0 \times 10^{-2}$ | $4.7 \times 10^{-1}$ | $4.9 \times 10^{-2}$ | $3.0 \times 10^{-2}$ | $1.3 \times 10^{-2}$ | 2.5 (1.2-5.2) | 0.31 | <i>LOC100507193</i> |
| rs393994   | 1 (49108745)  | T/C     | $2.4 \times 10^{-1}$ | $7.9 \times 10^{-3}$ | $1.4 \times 10^{-2}$ | $7.9 \times 10^{-3}$ | $1.4 \times 10^{-2}$ | 2.1 (1.2-4.0) | 0.50 | <i>AGBLA</i>        |
| rs10946737 | 6 (24967240)  | A/G     | $1.0 \times 10^{+0}$ | $3.8 \times 10^{-2}$ | $5.0 \times 10^{-2}$ | $3.8 \times 10^{-2}$ | $8.6 \times 10^{-2}$ | 2.2 (0.9-5.4) | 0.10 | <i>FAM65B</i>       |
| rs7708937  | 5 (123169574) | T/C     | $1.0 \times 10^{+0}$ | $1.5 \times 10^{-1}$ | $1.8 \times 10^{-1}$ | $1.5 \times 10^{-1}$ | $1.3 \times 10^{-1}$ | 2.6 (0.8-8.7) | 0.12 | <i>KRT18P16</i>     |
| rs10946739 | 6 (24993127)  | A/G     | $5.5 \times 10^{-1}$ | $1.1 \times 10^{-1}$ | $1.1 \times 10^{-1}$ | $1.1 \times 10^{-1}$ | $1.8 \times 10^{-1}$ | 1.7 (0.8-3.6) | 0.18 | <i>FAM65B</i>       |
| rs2069912  | 2 (128178191) | T/C     | $1.0 \times 10^{+0}$ | $4.8 \times 10^{-1}$ | $4.0 \times 10^{-1}$ | $4.0 \times 10^{-1}$ | $2.5 \times 10^{-1}$ | 1.6 (0.7-3.5) | 0.21 | <i>PROC</i>         |
| rs2089910  | 11 (1874404)  | T/C     | $7.0 \times 10^{-1}$ | $5.2 \times 10^{-1}$ | $4.1 \times 10^{-1}$ | $4.1 \times 10^{-1}$ | $2.7 \times 10^{-1}$ | 1.5 (0.7-3.1) | 0.31 | <i>LSPI</i>         |
| rs4903067  | 14 (73286300) | T/C     | $6.3 \times 10^{-1}$ | $1.0 \times 10^{+0}$ | $4.0 \times 10^{-1}$ | $4.0 \times 10^{-1}$ | $3.2 \times 10^{-1}$ | 1.6 (0.6-4.0) | 0.15 | <i>DPF3</i>         |
| rs4733759  | 8 (128804840) | T/C     | $7.0 \times 10^{-1}$ | $1.0 \times 10^{+0}$ | $7.4 \times 10^{-1}$ | $7.0 \times 10^{-1}$ | $6.9 \times 10^{-1}$ | 1.2 (0.6-2.3) | 0.32 | <i>PVT1</i>         |
| rs3892834  | 12 (16486288) | A/G     | $1.0 \times 10^{+0}$ | $4.8 \times 10^{-1}$ | $7.5 \times 10^{-1}$ | $4.8 \times 10^{-1}$ | $8.1 \times 10^{-1}$ | 1.1 (0.6-2.0) | 0.28 | <i>MGST1</i>        |
| rs3959930  | 11 (15835975) | T/C     | $6.5 \times 10^{-1}$ | $8.4 \times 10^{-1}$ | $7.4 \times 10^{-1}$ | $6.5 \times 10^{-1}$ | $9.0 \times 10^{-1}$ | 1.1 (0.5-2.0) | 0.90 | <i>SOX6</i>         |
| rs239319   | 22 (34120608) | A/G     | $8.2 \times 10^{-1}$ | $7.9 \times 10^{-1}$ | $1.0 \times 10^{+0}$ | $7.9 \times 10^{-1}$ | $9.5 \times 10^{-1}$ | 1.1 (0.6-1.8) | 0.43 | <i>LARGE</i>        |

11vs - Dominant or recessive-inheritance model of Fisher's exact test depending on inheritance mode of allele 1; 22vs - Dominant or recessive-inheritance model of Fisher's exact test depending on inheritance mode of allele 2; 1vs2 - Allelic model of Fisher's exact test; ATDILI - Anti-tuberculosis drugs induced liver injury; Chr (loci) - Chromosome, and chromosomal loci based on NCBI built 37; CI - Confidence interval; MAF - Minor allele frequency; OR - Odds ratio;  $P_{\text{adj}}$  - Logistic  $P$ -value after adjustment for sex, HIV status, CD4 count and HIV viral load;  $P_{\min}$  - Minimum  $P$ -value among the genetic models of Fisher's exact test; RA - Risk allele; SNP - Single nucleotide polymorphism

**Table S3.** Top SNPs in the GWAS of the pattern of ATDILI.

| DILI Pattern   | SNP        | Chr (loci)     | Alleles | Case/control | $P_{min}$            | $P_{adj}$            | OR (95% CI)      | MAF  | Nearest gene        |
|----------------|------------|----------------|---------|--------------|----------------------|----------------------|------------------|------|---------------------|
| Cholestatic    | rs10182566 | 2 (29287708)   | T/C     | 19/354       | $1.2 \times 10^{-6}$ | $4.1 \times 10^{-6}$ | 6.0 (2.8-12.8)   | 0.24 | <i>C2orf71</i>      |
|                | rs12969241 | 18 (12842480)  | T/G     | 19/354       | $1.9 \times 10^{-4}$ | $6.8 \times 10^{-6}$ | 18.2 (5.1-64.4)  | 0.03 | <i>PTPN2</i>        |
|                | rs9507038  | 13 (23737972)  | A/C     | 19/354       | $4.1 \times 10^{-6}$ | $1.5 \times 10^{-5}$ | 6.2 (2.7-14.0)   | 0.34 | <i>SGCG</i>         |
|                | rs10504112 | 8 (52101444)   | T/C     | 19/354       | $1.0 \times 10^{-5}$ | $4.0 \times 10^{-5}$ | 4.6 (2.2-9.6)    | 0.18 | <i>PXDNL</i>        |
|                | rs3176320  | 6 (36646788)   | T/C     | 19/354       | $4.5 \times 10^{-6}$ | $3.7 \times 10^{-4}$ | 9.1 (2.7-30.7)   | 0.42 | <i>CDKN1A</i>       |
|                | rs2388757  | 10 (131939898) | A/G     | 19/354       | $8.0 \times 10^{-6}$ | $1.5 \times 10^{-3}$ | 3.1 (1.5-6.3)    | 0.35 | <i>GLRX3</i>        |
| Hepatocellular | rs1990046  | 7 (83747642)   | A/G     | 10/354       | $1.0 \times 10^{-6}$ | $3.7 \times 10^{-6}$ | 28.4 (6.9-117.3) | 0.05 | <i>SEMA3A</i>       |
|                | rs7183361  | 15 (57343199)  | A/C     | 10/354       | $9.8 \times 10^{-6}$ | $1.4 \times 10^{-5}$ | 11.6 (3.8-35.1)  | 0.06 | <i>TCF12</i>        |
|                | rs10865177 | 2 (41829089)   | A/G     | 10/354       | $3.9 \times 10^{-6}$ | $2.0 \times 10^{-5}$ | 8.1 (3.1-21.2)   | 0.06 | <i>LDHAP3</i>       |
|                | rs7615167  | 3 (107514134)  | A/G     | 10/354       | $6.9 \times 10^{-6}$ | $3.7 \times 10^{-5}$ | 8.8 (3.1-24.8)   | 0.08 | <i>BBX</i>          |
|                | rs1926559  | 10 (114052917) | A/G     | 10/354       | $7.7 \times 10^{-6}$ | $4.6 \times 10^{-5}$ | 7.2 (2.8-18.5)   | 0.11 | <i>TECTB</i>        |
|                | rs9982437  | 21 (40123424)  | T/C     | 10/354       | $1.7 \times 10^{-7}$ | $1.0 \times 10^{+0}$ | NA               | 0.48 | <i>LINC00114</i>    |
| Mixed          | rs12603186 | 17 (11218707)  | A/G     | 19/354       | $4.8 \times 10^{-6}$ | $8.1 \times 10^{-6}$ | 7.2 (3.0-17.2)   | 0.11 | <i>SHISA6</i>       |
|                | rs2089910  | 11 (1874404)   | T/C     | 19/354       | $3.9 \times 10^{-7}$ | $9.5 \times 10^{-6}$ | 5.8 (2.7-12.6)   | 0.29 | <i>LSP1</i>         |
|                | rs1432988  | 5 (164771289)  | A/G     | 19/353       | $2.7 \times 10^{-6}$ | $1.3 \times 10^{-5}$ | 5.5 (2.6-11.8)   | 0.32 | <i>LOC100507193</i> |
|                | rs8039957  | 15 (74664851)  | A/G     | 19/354       | $2.8 \times 10^{-6}$ | $1.3 \times 10^{-5}$ | 5.6 (2.6-12.2)   | 0.16 | <i>CYP11A1</i>      |
|                | rs1983476  | 7 (102065322)  | T/C     | 19/354       | $7.7 \times 10^{-6}$ | $1.7 \times 10^{-5}$ | 7.3 (2.9-18.1)   | 0.05 | <i>LOC100630923</i> |
|                | rs1413611  | 10 (36466891)  | A/G     | 19/354       | $8.1 \times 10^{-6}$ | $2.1 \times 10^{-5}$ | 4.8 (2.3-9.8)    | 0.19 | <i>NAMPTL</i>       |

ATDILI - Anti-tuberculosis drugs induced liver injury; Chr (loci) - Chromosome, and chromosomal loci based on NCBI built 37; CI - Confidence interval; DILI - Drugs induced liver injury; GWAS - Genome wide association study; MAF - Minor allele frequency; NA - Not applicable; OR - Odds ratio;  $P_{adj}$  - Logistic  $P$ -value after adjustment for sex, HIV status, CD4 count and HIV viral load;  $P_{min}$  - Minimum  $P$ -value among the genetic models (dominant, recessive and allelic) of Fisher's exact test; RA - Risk allele; SNP - Single nucleotide polymorphism

**Table S4.** Top SNPs for GWAS of ATDILI in genes related to autoimmune diseases, oxidative stress, pharmacokinetic, and HLA region.

| SNP        | Chrloc         | Alleles | P_min                | P_adj                | OR (95% CI)     | MAF  | Nearest gene     |
|------------|----------------|---------|----------------------|----------------------|-----------------|------|------------------|
| rs12969241 | 18 (12842480)  | T/G     | 1.3x10 <sup>-4</sup> | 1.1x10 <sup>-5</sup> | 9.1 (3.3-24.9)  | 0.03 | <i>PTPN2</i>     |
| rs7958375  | 12 (111640017) | A/G     | 8.8x10 <sup>-5</sup> | 1.2x10 <sup>-5</sup> | 11.3 (3.8-33.5) | 0.02 | <i>CUX2</i>      |
| rs2103025  | 3 (188070570)  | A/G     | 1.7x10 <sup>-4</sup> | 4.9x10 <sup>-4</sup> | 2.9 (1.6-5.2)   | 0.32 | <i>LPP</i>       |
| rs404046   | 6 (29923817)   | T/C     | 2.0x10 <sup>-3</sup> | 1.2x10 <sup>-3</sup> | 2.7 (1.5-5.0)   | 0.18 | <i>HLA-W</i>     |
| rs4479187  | 15 (38711486)  | T/C     | 7.2x10 <sup>-4</sup> | 1.3x10 <sup>-3</sup> | 2.1 (1.3-3.3)   | 0.37 | <i>FAM98B</i>    |
| rs885622   | 1 (97691005)   | T/C     | 2.2x10 <sup>-3</sup> | 2.3x10 <sup>-3</sup> | 2.7 (1.5-5.0)   | 0.20 | <i>DPYD</i>      |
| rs4148328  | 2 (234677659)  | A/G     | 4.3x10 <sup>-3</sup> | 4.6x10 <sup>-3</sup> | 1.9 (1.2-3.0)   | 0.26 | <i>UGT1A8</i>    |
| rs2842997  | 6 (160063852)  | A/G     | 5.1x10 <sup>-3</sup> | 7.1x10 <sup>-3</sup> | 5.5 (1.6-19.0)  | 0.35 | <i>SOD2</i>      |
| rs2758331  | 6 (160105070)  | T/G     | 8.8x10 <sup>-3</sup> | 7.7x10 <sup>-3</sup> | 5.3 (1.6-17.9)  | 0.34 | <i>SOD2</i>      |
| rs9348834  | 6 (29864497)   | A/G     | 1.0x10 <sup>-3</sup> | 8.3x10 <sup>-3</sup> | 5.1 (1.6-16.4)  | 0.13 | <i>HLA-T</i>     |
| rs12543818 | 8 (18271912)   | A/C     | 1.9x10 <sup>-3</sup> | 1.1x10 <sup>-2</sup> | 3.4 (1.7-6.9)   | 0.37 | <i>NAT2</i>      |
| rs2248927  | 6 (29702709)   | T/C     | 2.5x10 <sup>-3</sup> | 2.5x10 <sup>-2</sup> | 2.7 (1.4-5.0)   | 0.50 | <i>HLA-F-ASI</i> |
| rs7670819  | 4 (70481880)   | T/C     | 2.9x10 <sup>-3</sup> | 4.5x10 <sup>-1</sup> | 1.2 (0.8-1.8)   | 0.45 | <i>UGT2A1</i>    |

ATDILI - Anti-tuberculosis drugs induced liver injury; Chr (loci) - Chromosome, and chromosomal loci based on NCBI built 37; CI - Confidence interval; GWAS - Genome wide association study; HLA - Human leukocyte antigen; MAF - Minor allele frequency; OR - Odds ratio; *P*\_adj - Logistic *P*-value after adjustment for sex, HIV status, CD4 count and HIV viral load; *P*\_min - Minimum *P*-value among the genetic models (dominant, recessive or allelic) of Fisher's exact test; SNP - Single nucleotide polymorphism
